# Supplementary material
Source: HighWire-hosted journal article supplement (http://www.jneurosci.org/highwire/filestream/600500/field_highwire_adjunct_files/5/Figure_S6.pdf)

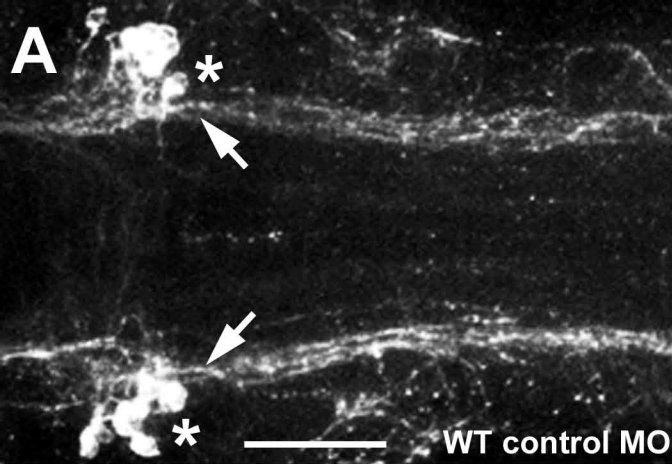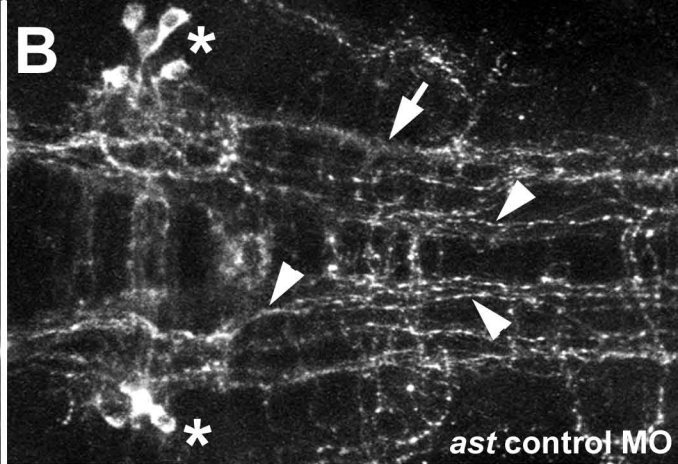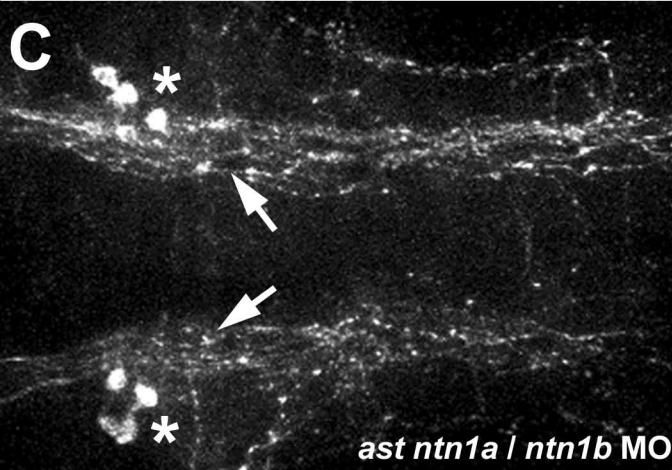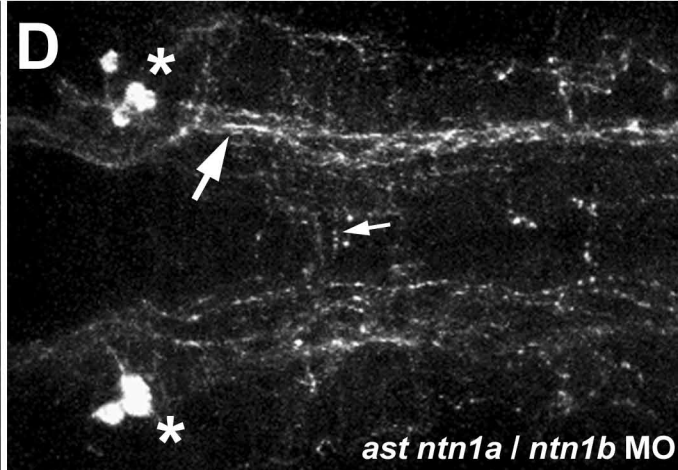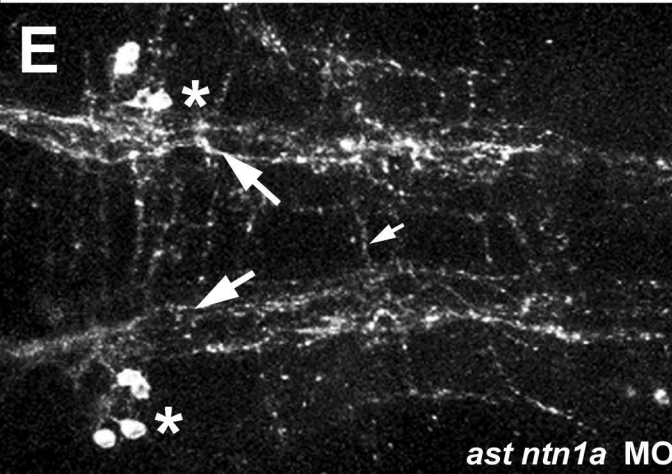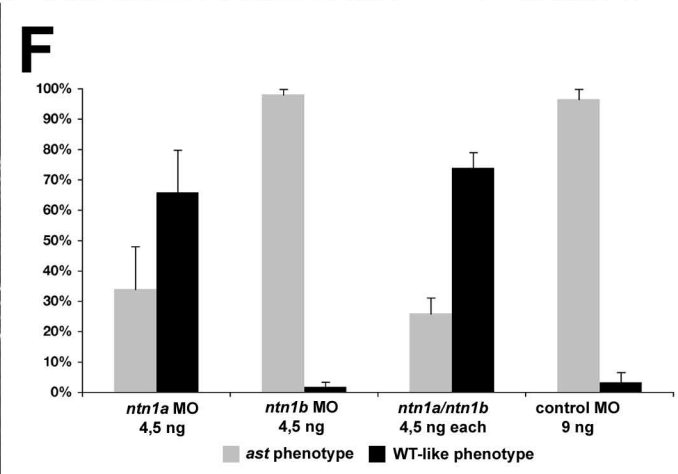

Supplement: Figure_S6.pdf [file Figure_S6.pdf]
